# Supplementary material for: Polybetaine-enhanced hybrid ionomer cement shows improved total biological effect with bacterial resistance and cellular stimulation
Source: Royal Society of Chemistry journal article supplement (doi:10.1039/d2bm01428a), 2022-12-01
Supplement: d2bm01428a1.pdf [file d2bm01428a1.pdf]

## Supporting information

# Polybetaine-enhanced hybrid ionomer cement shows improved total biological effect with bacterial resistance and cellular stimulation

Utkarsh Mangal<sup>a, ‡</sup>, Tae-Yun Kang<sup>b, ‡</sup>, Ju Won Jung<sup>b,c</sup>, Ji-Yeong Kim<sup>a,d</sup>, Ji-Young Seo<sup>a</sup>, Jung-Yul Cha<sup>a</sup>, Kee-Joon Lee<sup>a</sup>, Hyung-Seog Yu<sup>a</sup>, Kwang-Mahn Kim<sup>b</sup>, Jin-Man Kim<sup>c,\*</sup>, Jae-Sung Kwon<sup>b,d,\*</sup>, and Sung-Hwan Choi<sup>a,d,\*</sup>

<sup>a</sup>Department of Orthodontics, Institute of Craniofacial Deformity, Yonsei University College of Dentistry, 50-1 Yonsei-ro, Seodaemun-gu, Seoul 03722, Republic of Korea

<sup>b</sup>Department and Research Institute of Dental Biomaterials and Bioengineering, Yonsei University College of Dentistry, 50-1 Yonsei-ro, Seodaemun-gu, Seoul 03722, Republic of Korea

<sup>c</sup>Department of Oral Microbiology and Immunology, School of Dentistry and Dental Research Institute, Seoul National University, Seoul, 08826, South Korea

<sup>d</sup>BK21 FOUR Project, Yonsei University College of Dentistry, 50-1 Yonsei-ro, Seodaemun-gu, Seoul 03722, Republic of Korea

<sup>‡</sup>These authors contributed equally to the article

\*Correspondence to Jin-Man Kim (E-mail: jinmankim@snu.ac.kr), Jae-Sung Kwon (E-mail: jkwon@yuhs.ac), and Sung-Hwan Choi (Email: selfexam@yuhs.ac).

**Table S1.** Composition of different groups of hybrid ionomer cement (HIC). Powder/liquid ratio: 0.33 g/0.10 g

| Group         | Composition (g) |       |       |        |        |
|---------------|-----------------|-------|-------|--------|--------|
|               | MPC:SB          | MPC   | SB    | Powder | Liquid |
| CTRL          | 0               | 0     | 0     | 16     | 5      |
| $\alpha$ -mZM | 1:1             | 0.315 | 0.315 | 15.52  | 4.85   |
| $\beta$ -mZM  | 1:2             | 0.21  | 0.42  | 15.52  | 4.85   |
| $\gamma$ -mZM | 2:1             | 0.42  | 0.21  | 15.52  | 4.85   |

Powder; Strontium fluoroaluminosilicate dental glass, Lot no: 2008051, MPC; 2-methacryloyloxyethyl phosphorylcholine, SB; sulfobetaine methacrylate

**Table S2.** Major elemental compositions of investigated materials determined with energy-dispersive x-ray spectroscopy surface analysis

| Group         | Element (Wt.%) |       |       |       |       |      |      |      |
|---------------|----------------|-------|-------|-------|-------|------|------|------|
|               | O              | Sr    | Si    | Al    | F     | P    | Na   | Ca   |
| CTRL          | 32.75          | 22.95 | 17.85 | 12.95 | 11.32 | 1.02 | 0.66 | 0.48 |
| $\alpha$ -mZM | 28.92          | 25.28 | 19.36 | 13.98 | 10.19 | 1.64 | 0.29 | 0.33 |
| $\beta$ -mZM  | 30.88          | 24.19 | 18.69 | 13.54 | 10.86 | 1.33 | 0.36 | 0.15 |
| $\gamma$ -mZM | 32.04          | 23.15 | 17.98 | 13.38 | 11.23 | 1.42 | 0.3  | 0.5  |

**Table S3.** LDA score for differentially abundant taxa

| <b>Significantly different taxonomic marker</b> | <b>LDA score (log10)</b> |
|-------------------------------------------------|--------------------------|
| <i>Veillonella dispar</i>                       | 4.6282                   |
| <i>Streptococcus pneumoniae</i> group           | 4.35581                  |
| <i>Haemophilus parainfluenzae</i> group         | 4.16423                  |
| <i>Veillonella atypica</i>                      | 3.95069                  |
| <i>Veillonella rogosae</i>                      | 3.88056                  |
| <i>Veillonella_uc</i>                           | 3.23743                  |
| <i>Streptococcus constellatus</i> group         | 3.07448                  |
| <i>Gemella haemolysans</i> group                | 2.94345                  |
| <i>Lactobacillus fermentum</i>                  | 2.29111                  |

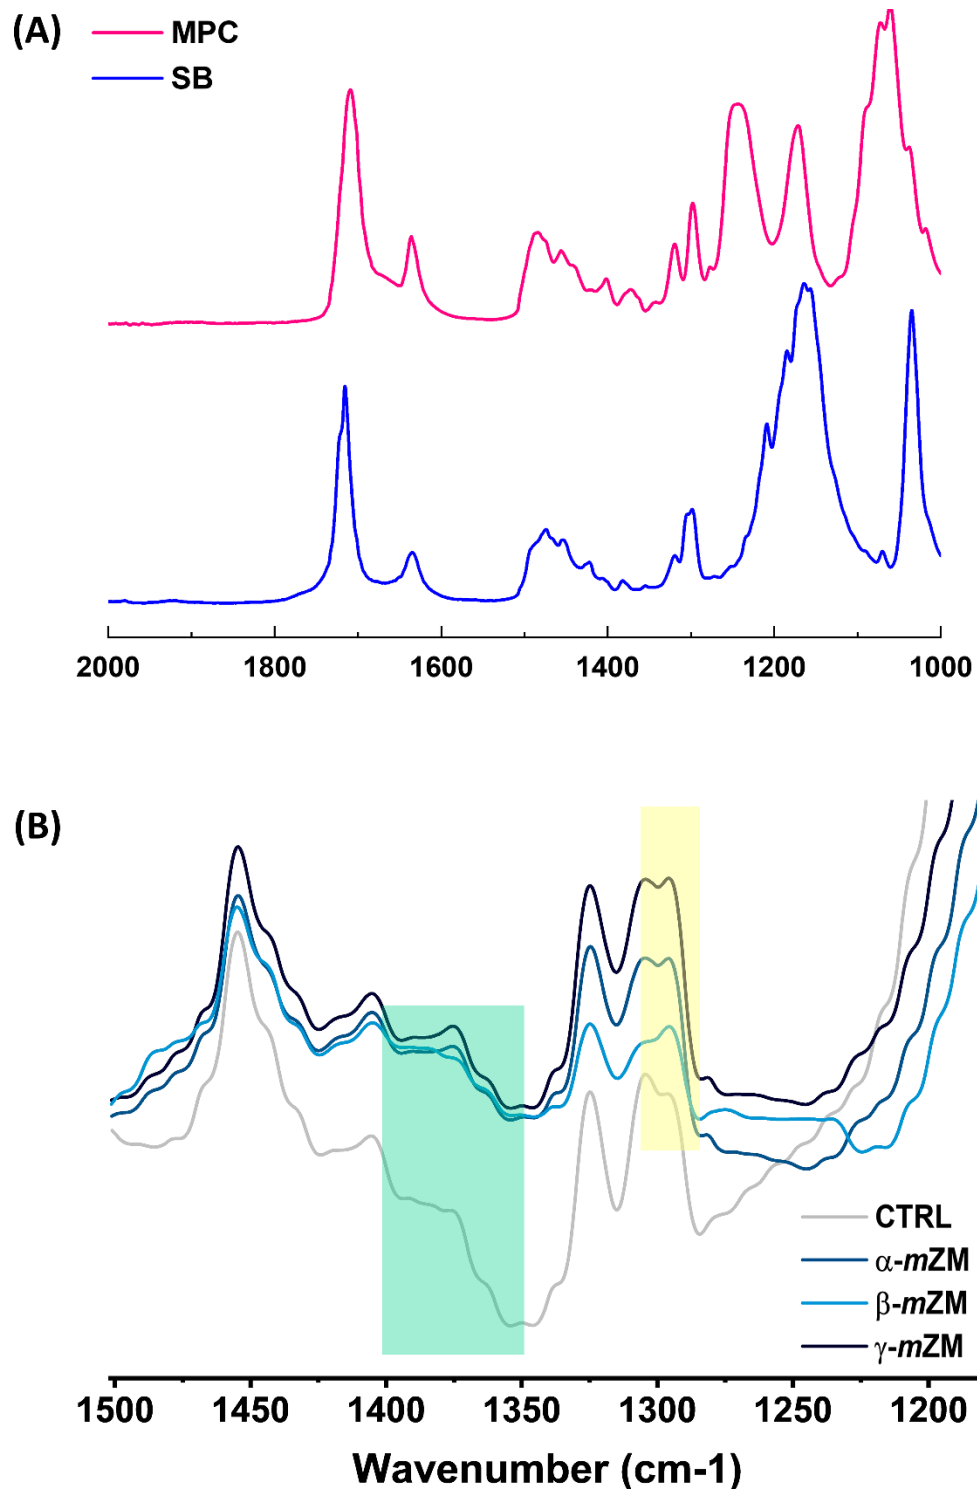

**Figure S1.** (A) Reference spectra for the polybetaines, 2-methacryloyloxyethyl phosphorylcholine (MPC) and sulfobetaine methacrylate (SB). (B) Inset in Figure 1A showing spectra for wavenumber range of 1200–1500 cm<sup>-1</sup> and highlights phosphoryl halide (yellow) and S=O (green) absorbance regions.

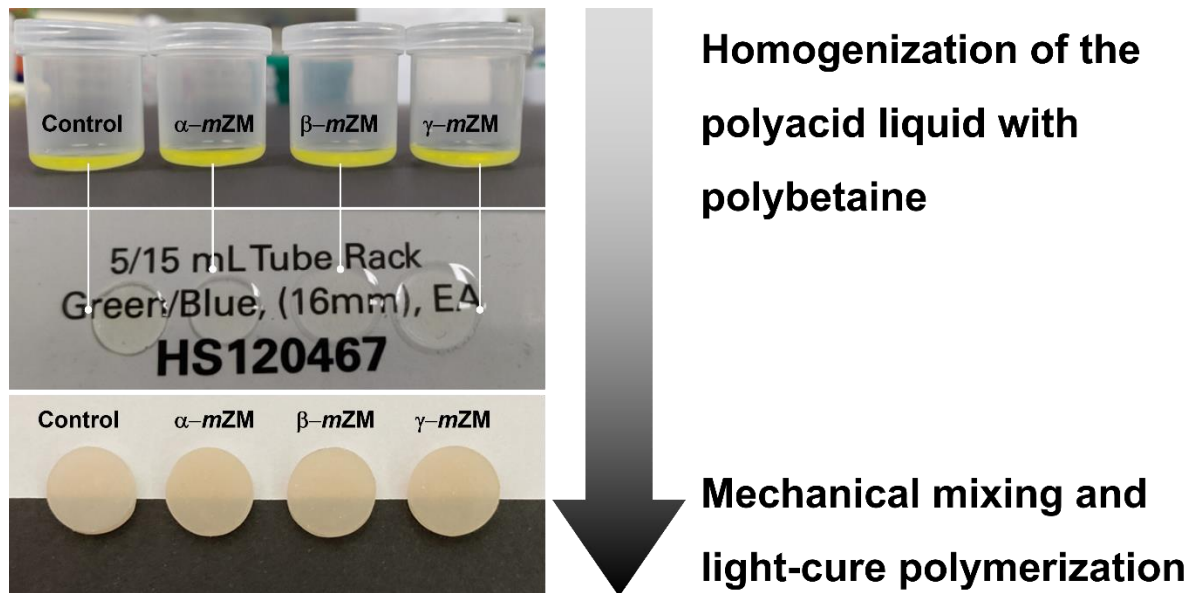

**Figure S2.** Fabrication of hybrid ionomer cement samples. Liquid was homogenized with polybetaine derivatives and mechanically mixed with amorphous glass powder and light cured.

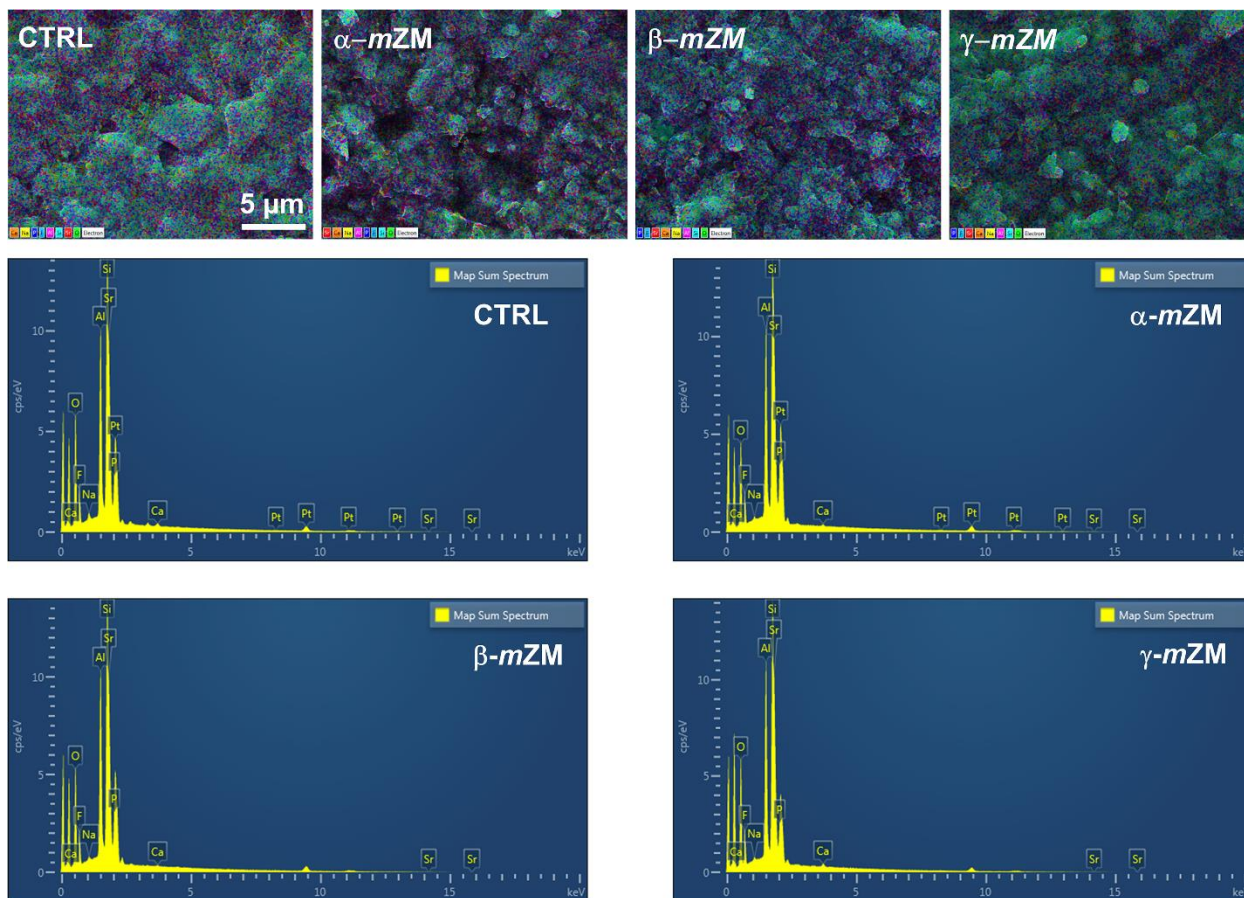

**Figure S3.** Energy-dispersive X-ray spectroscopy (EDS) mapping spectra of surfaces of HIC specimens and corresponding electron microscopy images. Scale bar is 5  $\mu\text{m}$ . Corresponding elemental weight percentages are as described in Table S2.

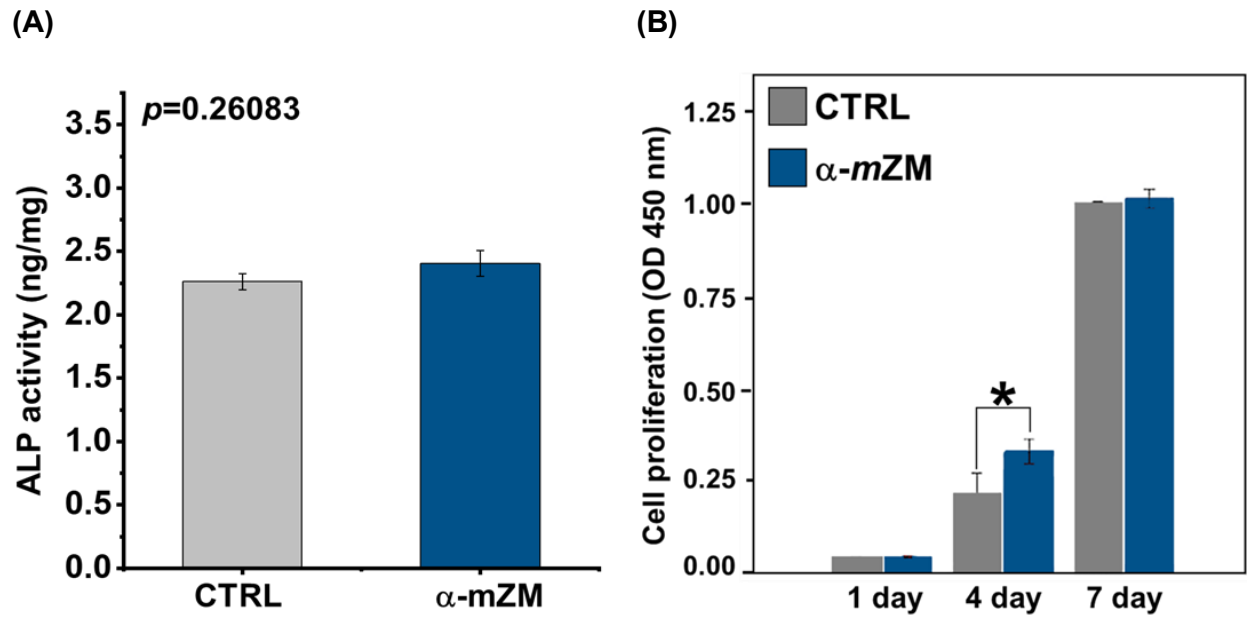

**Figure S4.** (A) Alkaline phosphatase expression of hDPSCs after 14-day culture.  $*p < 0.05$ . (B) Cell proliferation assay from cumulative 14-day extract of HIC samples.

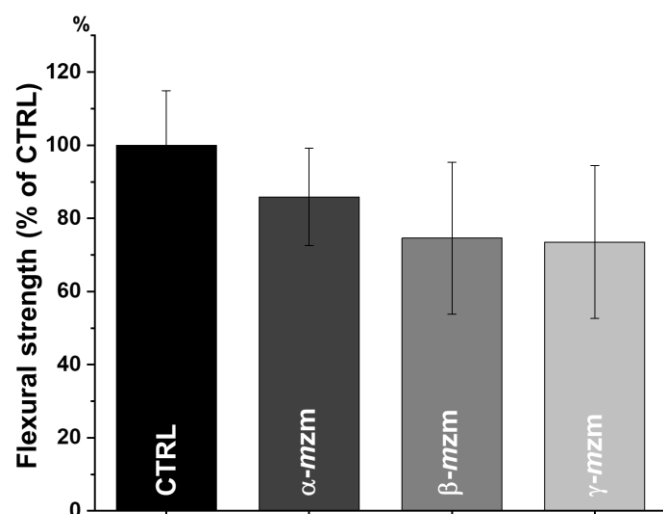

**Figure S5** Change in flexural strength of the hybrid ionomer change with polybetaine enhancement with respect to CTRL group. CTRL; unmodified hybrid ionomer cement. As the mechanical properties of hybrid ionomer cement are derived from resin components, based on the inherent composition proportions the mechanical properties can show variation. However, predictable, and consistent mechanical properties can be obtained by optimizing the monomer components (e.g., molecular weights, chain length) in tandem with the polybetaine combination.
